# Supplementary material for: High Gas Sensitivity to Nitrogen Dioxide of Nanocomposite ZnO-SnO2 Films Activated by a Surface Electric Field
Source: MDPI journal article supplement (doi:10.3390/nano12122025), 2022-06-12
Supplement: s1 [file s1]

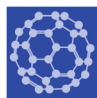

## High gas sensitivity to nitrogen dioxide of nanocomposite ZnO-SnO<sub>2</sub> films activated by a surface electric field

Victor V. Petrov<sup>1,\*</sup>, Aleksandra P. Ivanishcheva<sup>1</sup>, Maria G. Volkova<sup>2</sup>, Viktoriya Yu. Storozhenko<sup>2</sup>, Irina A. Gulyaeva<sup>1</sup>, Ilya V. Pankov<sup>3</sup>, Vadim A. Volochaev<sup>3</sup>, Soslan A. Khubezhov<sup>4,5,6</sup>, Ekaterina M. Bayan<sup>2</sup>

## High Gas Sensitivity to Nitrogen Dioxide of Nanocomposite ZnO-SnO<sub>2</sub> Films Activated by a Surface Electric Field

Victor V. Petrov<sup>1,\*</sup>, Alexandra P. Ivanishcheva<sup>1,\*</sup>, Maria G. Volkova<sup>2</sup>, Viktoriya Yu. Storozhenko<sup>2</sup>, Irina A. Gulyaeva<sup>1</sup>, Ilya V. Pankov<sup>3</sup>, Vadim A. Volochaev<sup>3</sup>, Soslan A. Khubezhov<sup>4,5,6</sup> and Ekaterina M. Bayan<sup>2</sup>

<sup>1</sup> Institute of Nanotechnologies, Electronics, and Equipment Engineering, Southern Federal University, 347928 Taganrog, Russia; a.starnikova@mail.ru (A.P.I.); tenirka@mail.ru (I.A.G.)

<sup>2</sup> Department of Chemistry, Southern Federal University, 344090 Rostov-on-Don, Russia; mvol@sfedu.ru (M.G.V.); viktoriastorozhenko@gmail.com (V.Y.S.); ekbayan@sfedu.ru (E.M.B.)

<sup>3</sup> Institute of Physical and Organic Chemistry, Southern Federal University, Stachki Av. 194/2, 344090 Rostov-on-Don, Russia; ipankov@sfedu.ru (I.V.P.); vvolochaev@sfedu.ru (V.A.V.)

<sup>4</sup> Research Laboratory of Functional Nanomaterials Technology, Southern Federal University, 347922 Shevchenko St. 2, 344006 Taganrog, Russia; soslan.khubezhov@metalab.ifmo.ru

<sup>5</sup> Department of Nanophotonics and Metamaterials, ITMO University, 197101 St. Petersburg, Russia

<sup>6</sup> Department of Physics, North-Ossetian State University, Vatutina Str. 46, 362025 Vladikavkaz, Russia

\* Correspondence: vvpetrov@sfedu.ru (V.V.P.); a.starnikova@mail.ru (A.P.I.); Tel.: +7-863-437-1624 (V.V.P.)

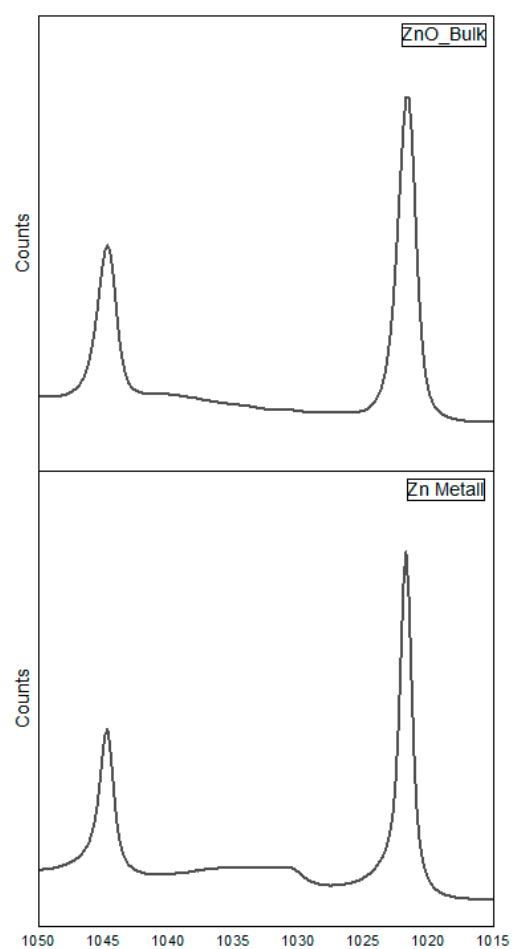

**Figure S1.** The XPS spectra of pure zinc and its oxide.

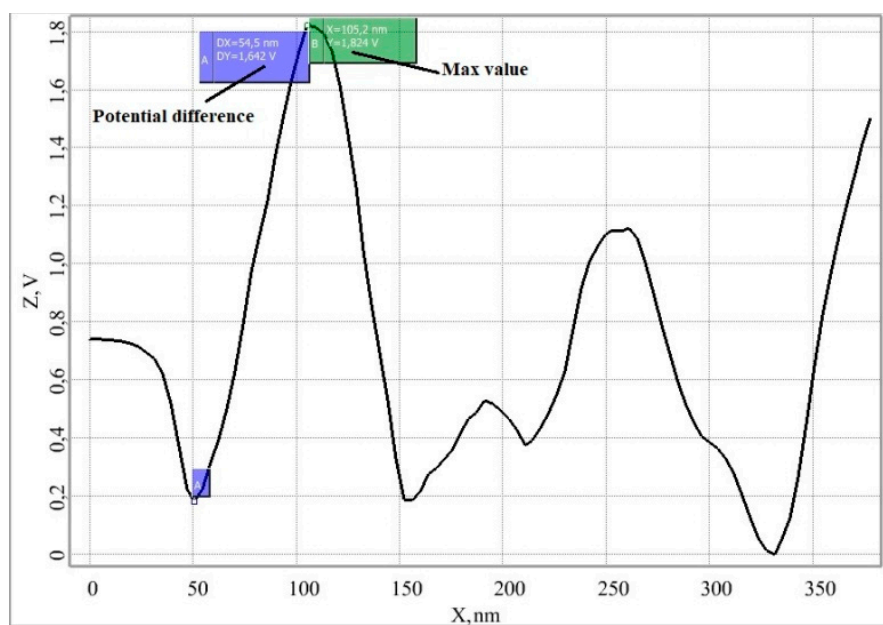

**Figure S2.** Distribution of the surface potential on the film surface 0.5ZnO.
